# Supplementary material for: Centriolar distal appendages activate the centrosome‐PIDDosome‐p53 signalling axis via ANKRD26
Source: PubMed Central journal article supplement — EMBO J. 2020 Dec 22;40(4):e104844. doi: 10.15252/embj.2020104844 (PMC7883297; doi:10.15252/embj.2020104844), 2020-12-22
Supplement: EMBJ-40-e104844-s002.pdf [file EMBJ-40-e104844-s002.pdf]

## Expanded View Figures

### Figure EV1. Peripheral DAPs are dispensable for ciliogenesis.

- A RPE1 cells of the indicated genotypes were subjected to serum-starvation followed by immunofluorescence with the indicated antibodies to visualize the PC. Representative micrographs are shown. Blow-ups without Hoechst 33342 are magnified 2 $\times$ . Scale bar: 5  $\mu$ m.
- B The percentage of ciliated cells was assessed by visual scoring of micrographs as in (A) across 3 biological replicates, with  $\geq 50$  cells per replicate. Individual values of biological replicates, their mean  $\pm$  s.e.m. are reported. ANOVA test, comparing each sample to the wild type (\*\* $P < 0.01$ ; n.s. = non-significant).
- C Fluorescence micrographs of RPE1 cells of the indicated genotypes, either left untransduced (mock) or transduced with a lentiviral vector expressing Myc-SCLT1, and co-stained with the indicated antibodies. Blow-ups without Hoechst 33342 are magnified 2.5 $\times$ . Scale bar: 5  $\mu$ m.
- D RPE1 cells of the indicated genotypes were either left untransduced (mock) or transduced with a lentiviral vector expressing Myc-SCLT1 and subjected to serum-starvation. Immunofluorescence with the indicated antibodies allowed visualization of the PC. Representative micrographs are shown. Blow-ups without Hoechst 33342 are magnified 2 $\times$ . Scale bar: 5  $\mu$ m.
- E Ciliary length was measured from the same dataset described in (B), violin plots showing values for individual cilia obtained by pooling at least three biological replicates ( $\geq 150$  cells); n.a. = not applicable due to absence of ciliated cells. Median values (red lines) and quartiles (black, dashed lines) are shown. Kruskal–Wallis test, comparing each sample to the wild type (\*\*\*\* $P < 0.0001$ ; n.s. = non-significant).
- F Scheme summarizing the epistatic interdependencies between DAPs emerging from data displayed in Fig 1 and the functional implications described in this figure. PC = primary cilium.

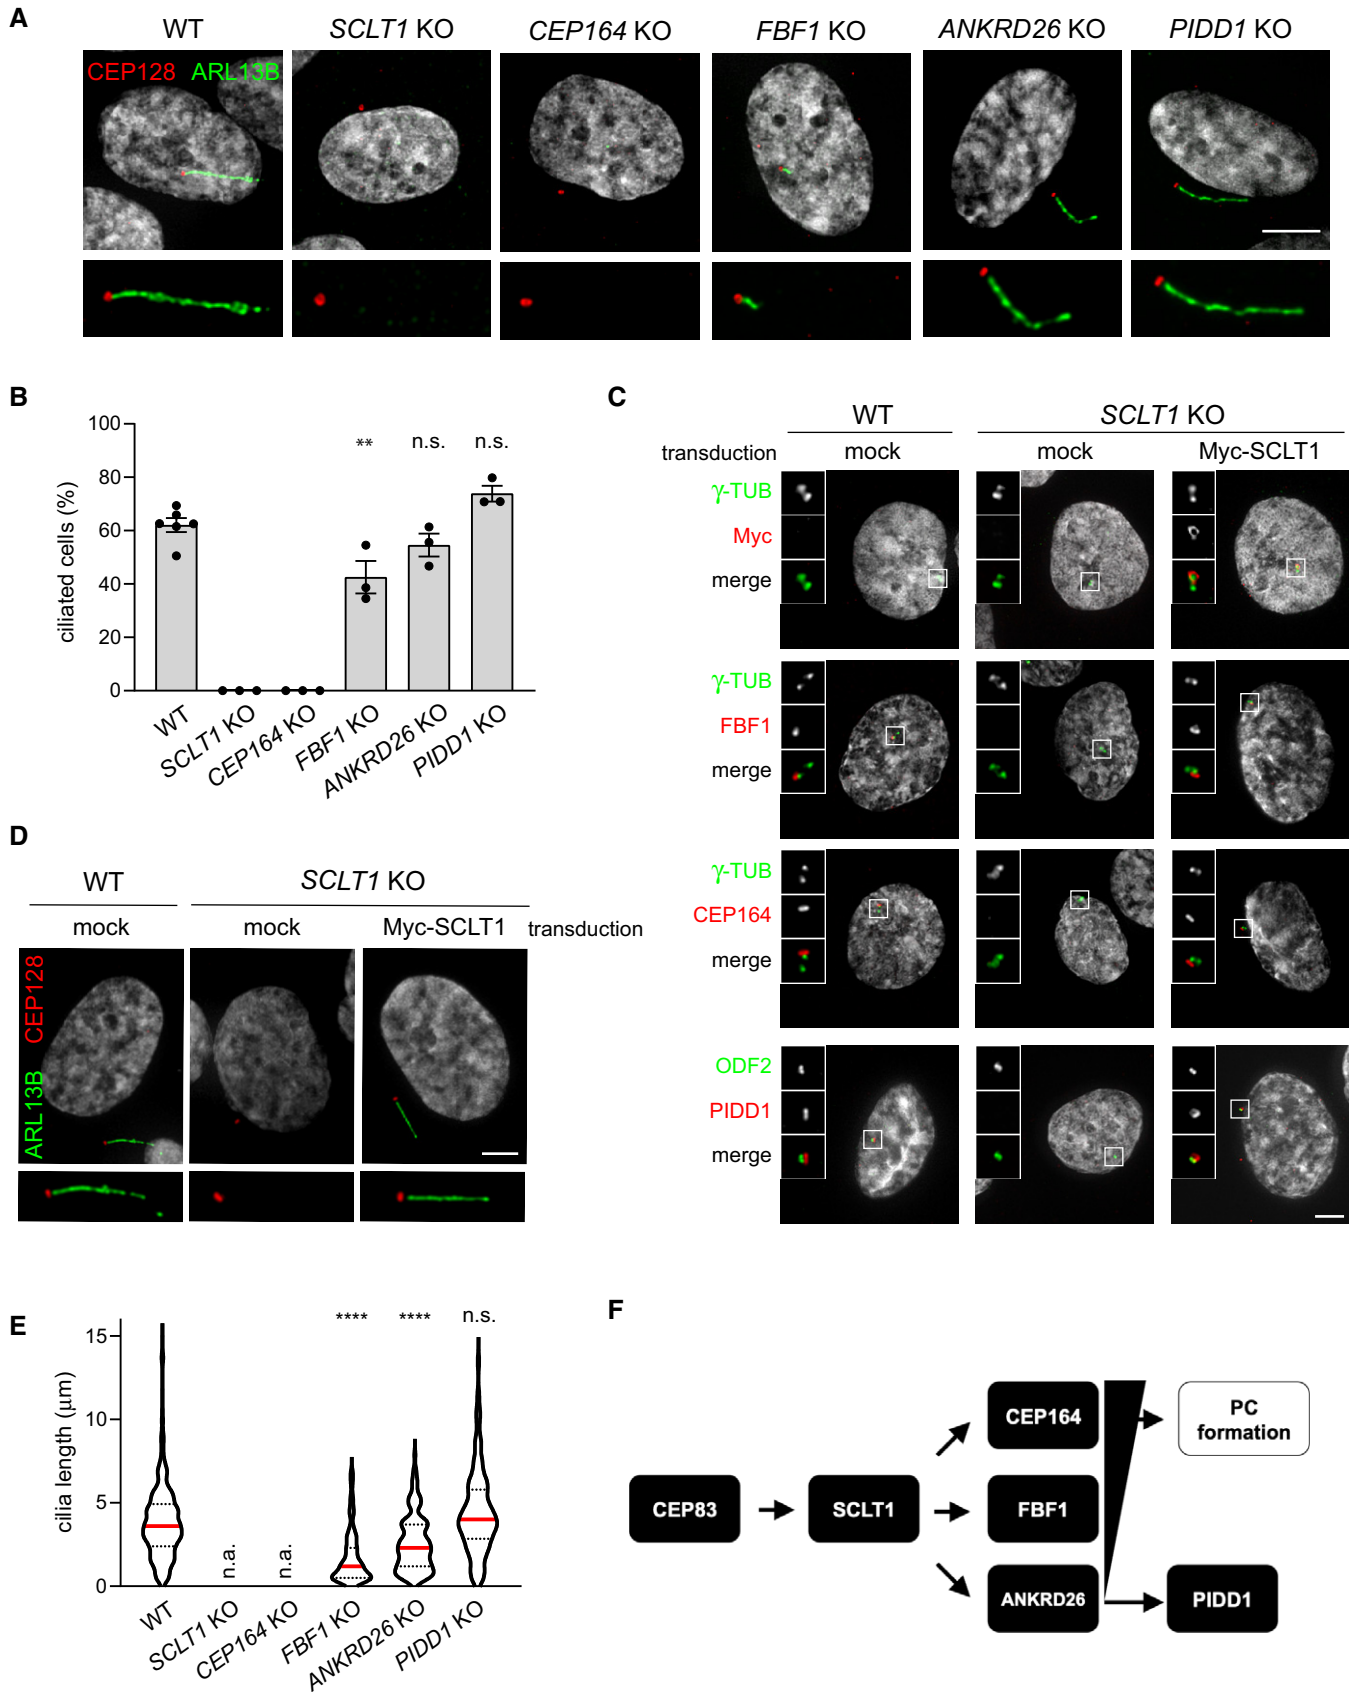

Figure EV1.

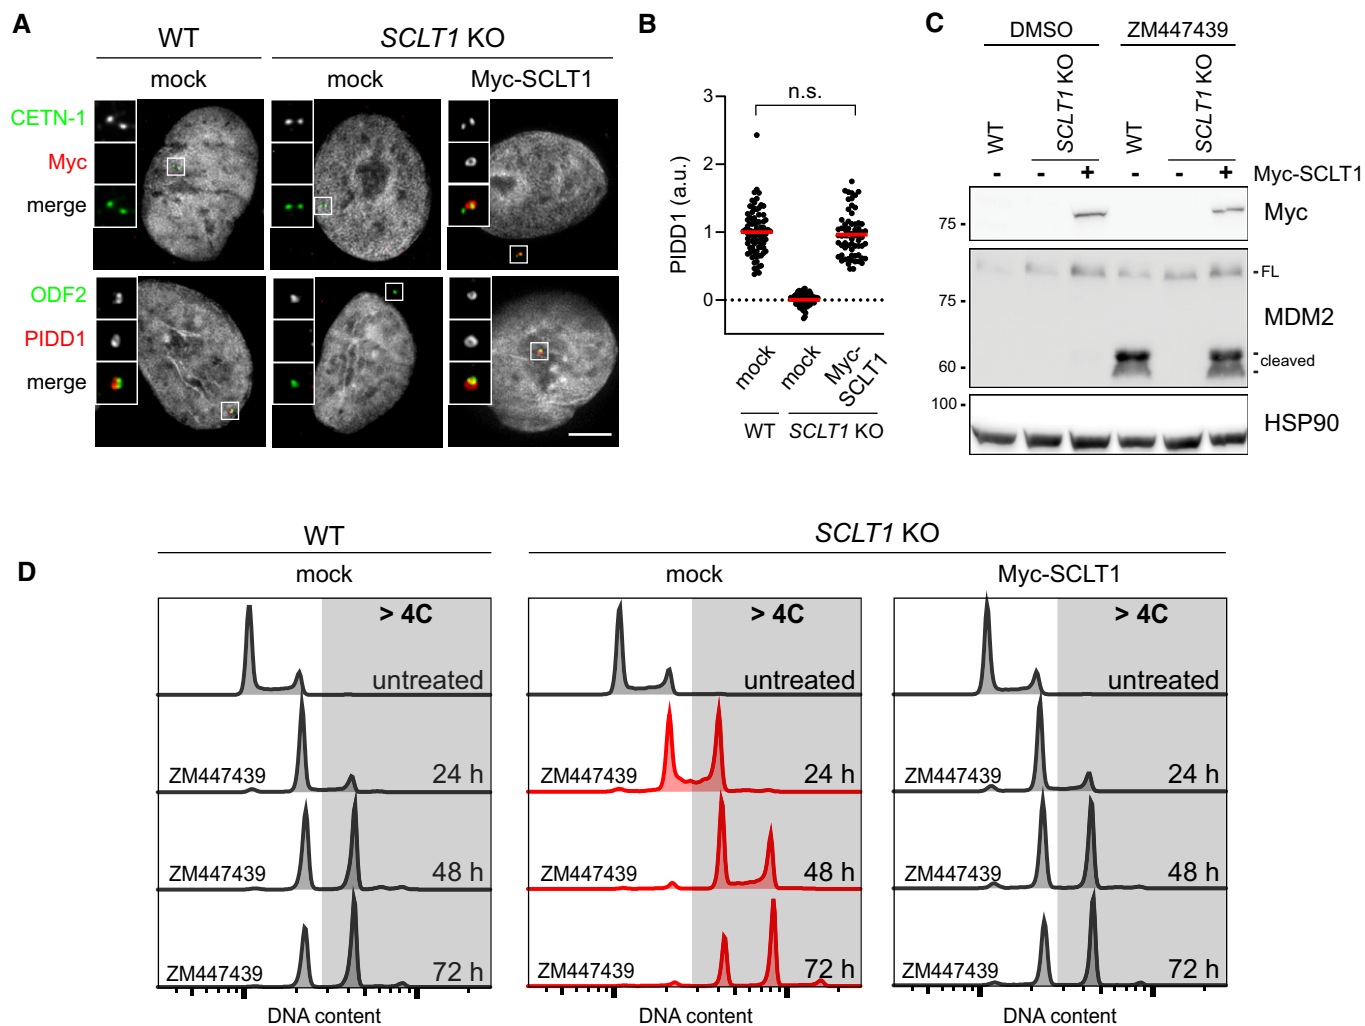

**Figure EV2. Complementation of SCLT1 in SCLT1 KO cells rescues PIDDosome activation also in A549 cells.**

A Fluorescence micrographs of A549 cells of the indicated genotypes. Cells were either left untransduced (mock) or transduced with a lentiviral vector expressing Myc-SCLT1 and co-stained with the indicated antibodies. Blow-ups without Hoechst 33342 are magnified 2.5 $\times$ . Scale bar: 5  $\mu$ m.

B Dot plot showing the average pixel intensities of PIDD1 at individual parent centrioles in A549 cells of the indicated genotypes, treated as in (A). Mean values (red lines)  $\pm$  s.e.m. are reported.  $N > 50$  centrosomes were assessed for each condition in as many individual cells; a.u. = arbitrary units. Mann-Whitney test (n.s. = non-significant).

C A549 cells of the indicated genotypes were either left untransduced (-) or transduced with a lentiviral vector expressing Myc-SCLT1 (+). Cells were treated either with DMSO or with ZM447439 for 24 h and subjected to immunoblotting;  $n = 3$  independent experiments.

D DNA content analysis of A549 cells of the indicated genotypes. Cells were either left untransduced (mock) or transduced with a lentiviral vector expressing Myc-SCLT1, treated with ZM447439 for up to 72 h and processed for DNA content analysis.

Source data are available online for this figure.

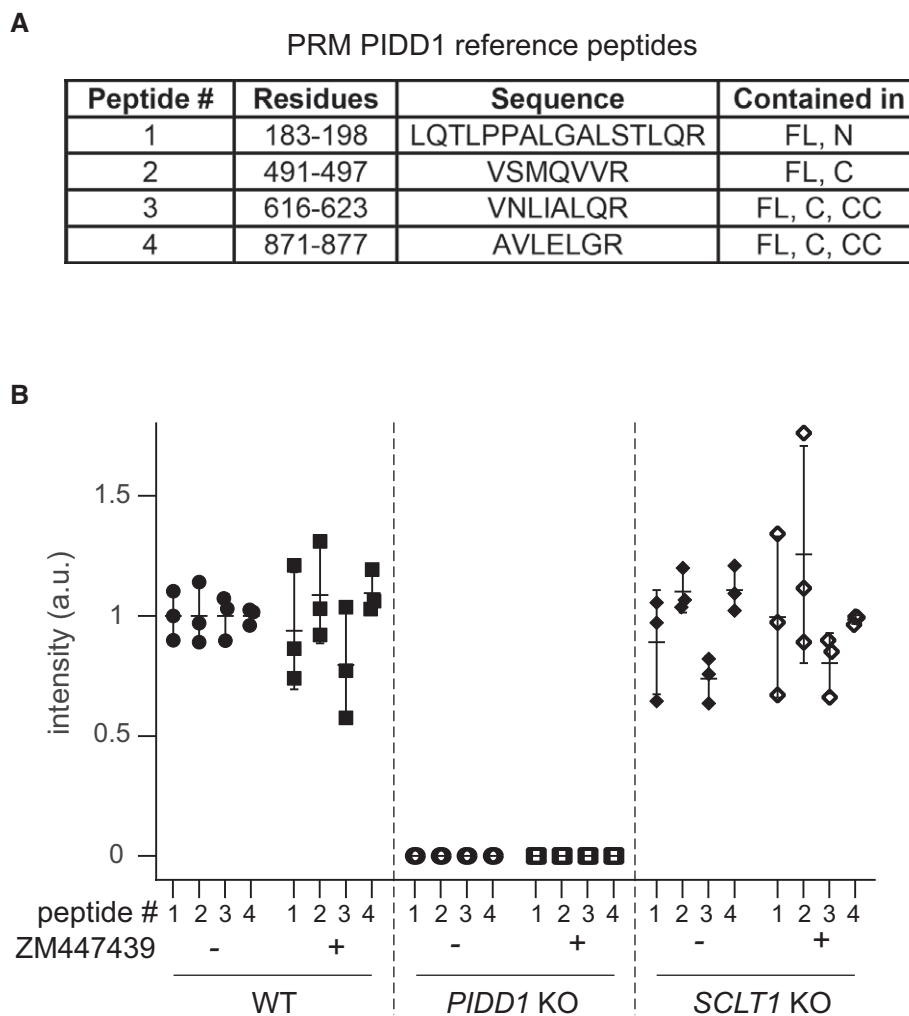

**Figure EV3. Endogenous PIDD1 localization to DAs does not influence its proteostasis.**

A Table reporting features of the reference (isotopically labelled) synthetic peptides that served as internal references for the quantification of the corresponding endogenous PIDD1 peptides.

B Quantification across a biological triplicate of four different PIDD1 peptides (described in A) in A549 cells of the indicated genotypes treated either with DMSO (-) or with ZM447439 (+) by means of parallel reaction monitoring. Mean values  $\pm$  standard deviation are reported.

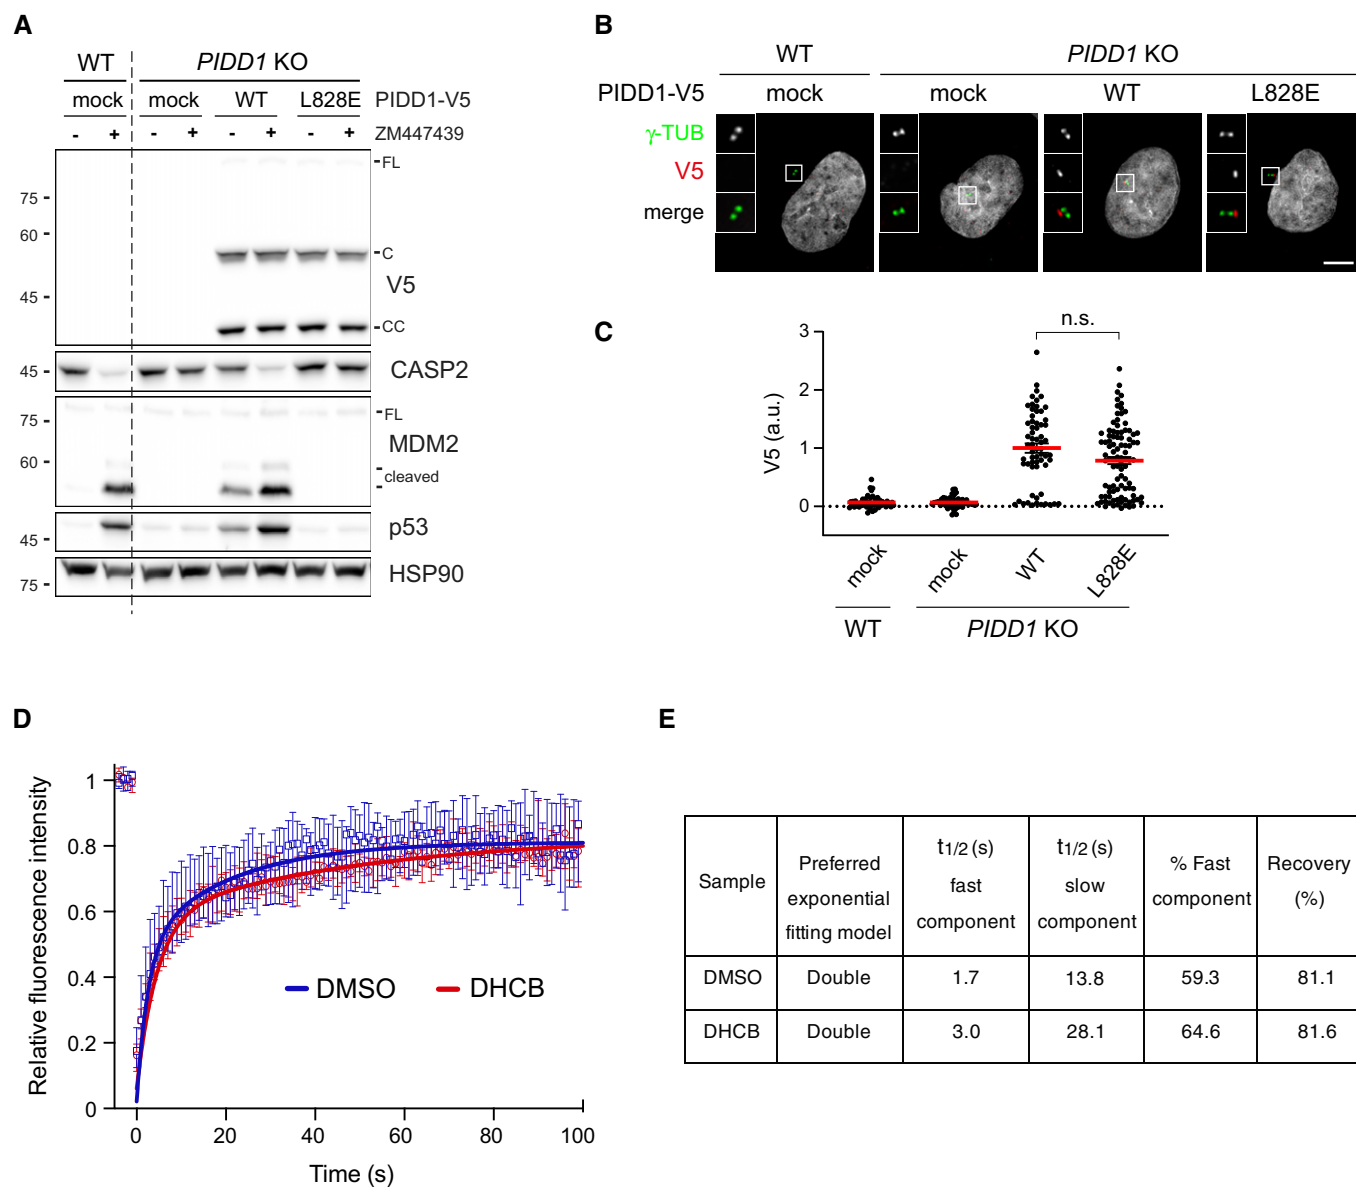

**Figure EV4. PIDD1 displays a rapid exchange rate between the centrosomal and cytoplasmic pool.**

- A A549 cells of the indicated genotypes were either left untransduced (mock) or transduced with lentiviral vectors expressing PIDD1-V5 in its wild-type form or carrying the L828E mutation. Cells were treated either with DMSO or with ZM447439 for 24 h and subjected to immunoblotting;  $n = 2$  independent experiments.
- B Fluorescence micrographs of A549 cells of the indicated genotypes, treated as in (A) and co-stained with the indicated antibodies. Blow-ups without Hoechst 33342 are magnified 2.5 $\times$ . Scale bar: 5  $\mu$ m.
- C Dot plot showing the average pixel intensities of V5-tag at individual parent centrioles in A549 cells, measured from micrographs as in (B). Mean values (red lines)  $\pm$  s.e.m. are reported.  $N > 50$  centrosomes were assessed for each condition in as many individual cells; a.u. = arbitrary units. Mann-Whitney test (n.s. = non-significant).
- D FRAP analyses of centrosomal PIDD1<sup>L828E</sup>-mNeonGreen turnover in PIDD1-deficient RPE1 cells treated with either DMSO or DHCB. Graph shows the median with interquartile range ( $n = 12$  cells per condition). FRAP curves for both experimental conditions were best fitted with a double exponential curve.
- E Relevant recovery parameters of FRAP experiments.

Source data are available online for this figure.

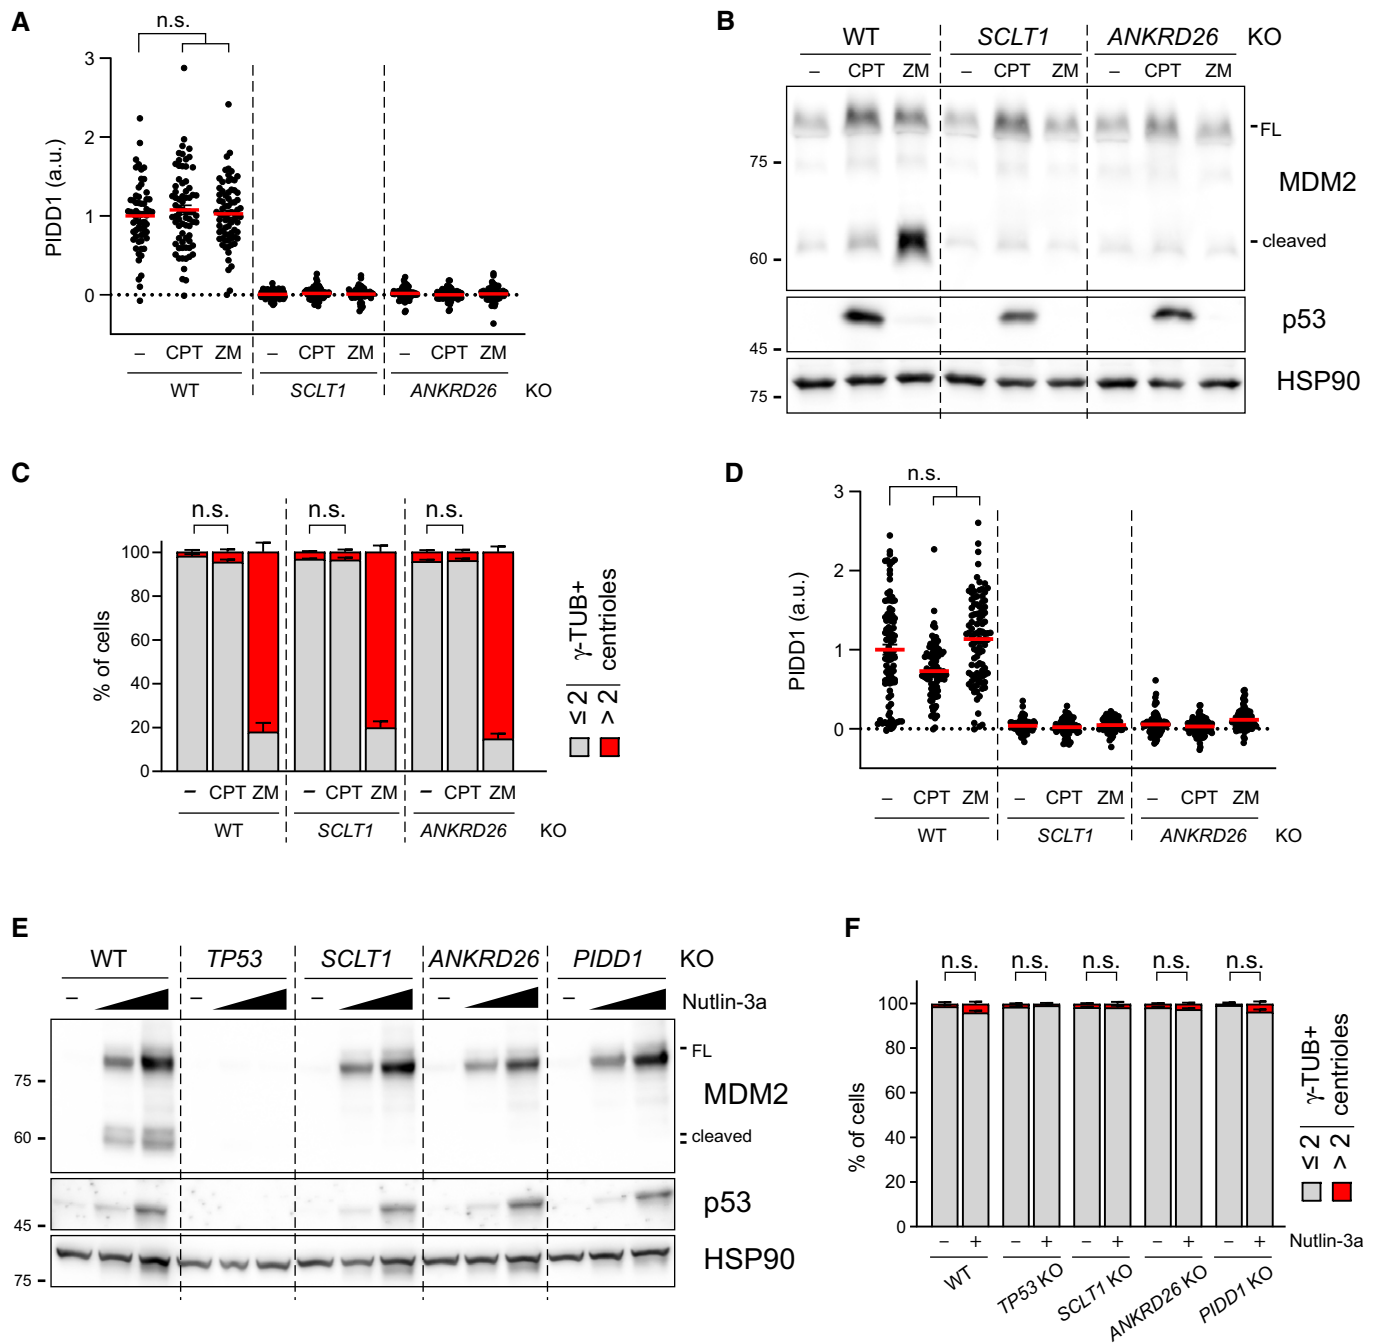

Figure EV5.

**Figure EV5. PIDD1 localization to DAs is required for PIDDosome activation in response to DNA damage also in RPE1 cells.**

- A Dot plot showing the average pixel intensities of PIDD1 at individual parent centrioles in A549 cells of the indicated genotypes and treatments (CPT = camptothecin, ZM = ZM447439). Mean values (red lines)  $\pm$  s.e.m. are reported.  $N > 50$  centrosomes were assessed for each condition in as many individual cells; a.u. = arbitrary units. Kruskal–Wallis test (n.s. = non-significant).
- B RPE1 cells of the indicated genotypes were treated either with CPT or ZM or DMSO for 24 h. Samples were subjected to immunoblotting;  $n = 3$  independent experiments.
- C RPE1 cells treated as in (B) were subjected to fluorescence microscopy and centrosome abundance was assessed by counting the number of  $\gamma$ -tubulin-positive centrioles per cell across different genotypes and treatments. Mean values  $\pm$  s.e.m. are reported.  $N = 3, \geq 50$  cells from each independent experiment. ANOVA test (n.s. = non-significant).
- D Dot plot showing the average pixel intensities of PIDD1 at individual parent centrioles in RPE1 of the indicated genotypes and treatments. Mean values (red lines)  $\pm$  s.e.m. are reported.  $N > 50$  centrosomes were assessed for each condition in as many individual cells; a.u. = arbitrary units. Kruskal–Wallis test (n.s. = non-significant).
- E RPE1 cells of the indicated genotypes were either left untreated or treated with Nutlin-3a (3.3  $\mu$ M or 10  $\mu$ M). Cells were subjected to immunoblotting;  $n = 3$  independent experiments.
- F A549 cells were either treated with 10  $\mu$ M Nutlin-3a for 24 h or left untreated. Cells were subjected to fluorescence microscopy and centrosome abundance was assessed by counting the number of  $\gamma$ -tubulin-positive centrioles per cell across different genotypes and treatments. Mean values  $\pm$  s.e.m. are reported.  $N = 3, \geq 50$  cells from each independent experiment. ANOVA test (n.s. = non-significant).

Source data are available online for this figure.
