# Supplementary material for: Centriolar distal appendages activate the centrosome‐PIDDosome‐p53 signalling axis via ANKRD26
Source: PubMed Central journal article supplement — EMBO J. 2020 Dec 22;40(4):e104844. doi: 10.15252/embj.2020104844 (PMC7883297; doi:10.15252/embj.2020104844), 2020-12-22
Supplement: EMBJ-40-e104844-s008.pdf [file EMBJ-40-e104844-s008.pdf]

Western Blot membranes relative to figure 3A

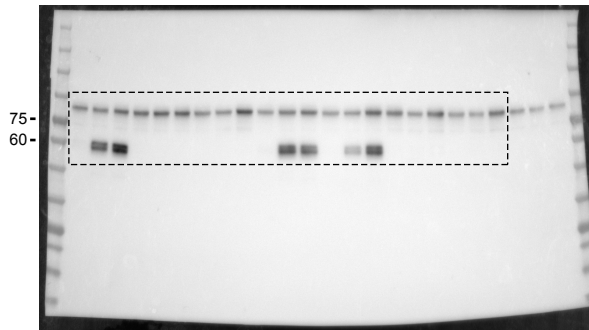

MDM2

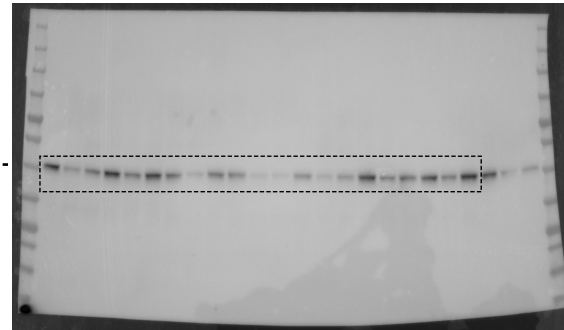

CASP2

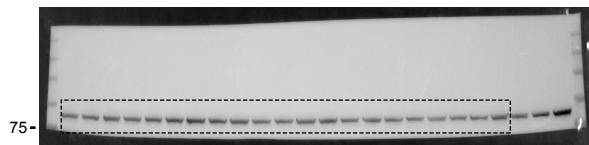

HSP90

Western Blot membranes relative to figure 3F

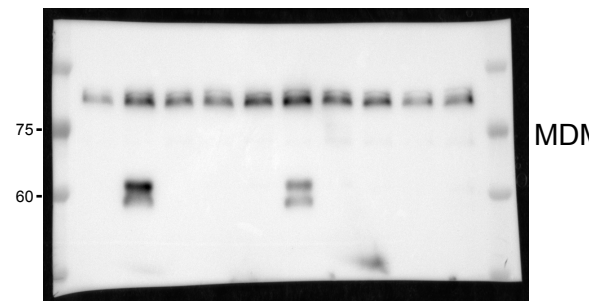

MDM2

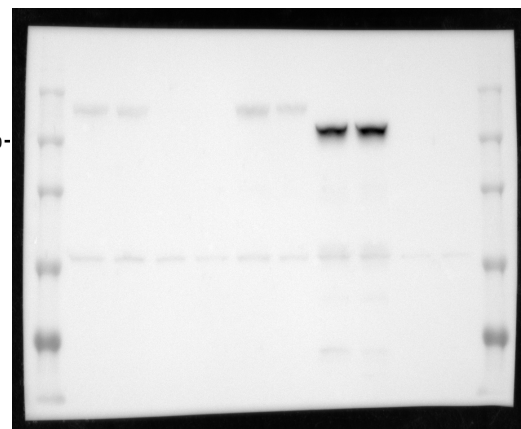

ANKRD26

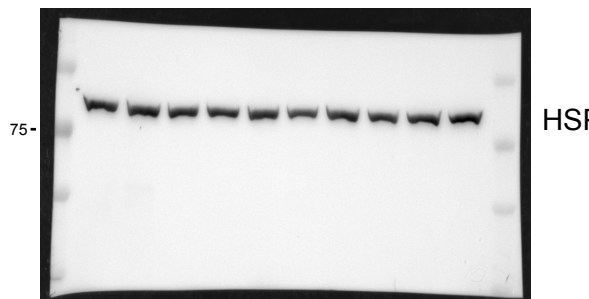

HSP90

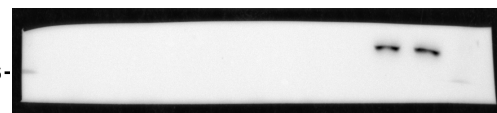

Myc
