# Supplementary figures and images for: Centriolar distal appendages activate the centrosome‐PIDDosome‐p53 signalling axis via ANKRD26
Source: PubMed Central journal article supplement — EMBO J. 2020 Dec 22;40(4):e104844. doi: 10.15252/embj.2020104844 (PMC7883297; doi:10.15252/embj.2020104844), 2020-12-22

Western Blot membranes relative to figure 4B

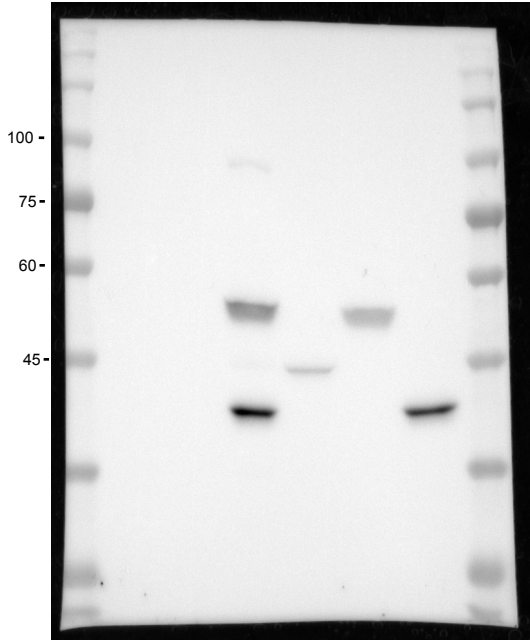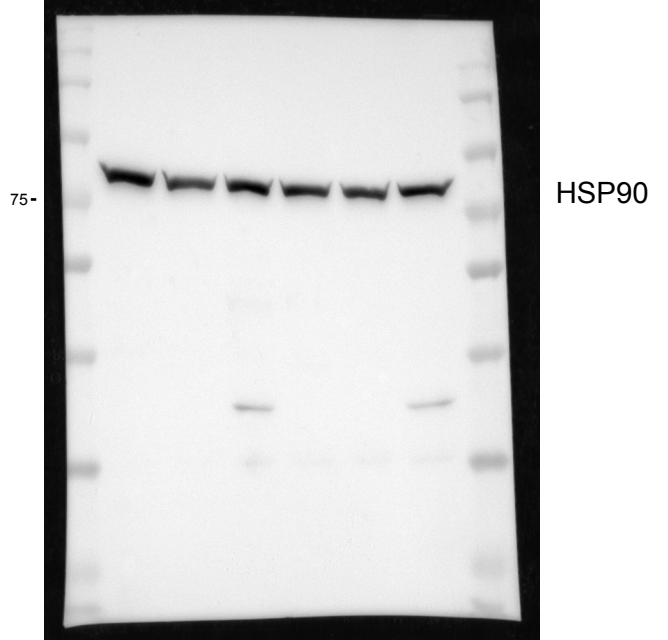

Supplement: EMBJ-40-e104844-s009.pdf [file EMBJ-40-e104844-s009.pdf]

Western Blot membranes relative to figure 7B

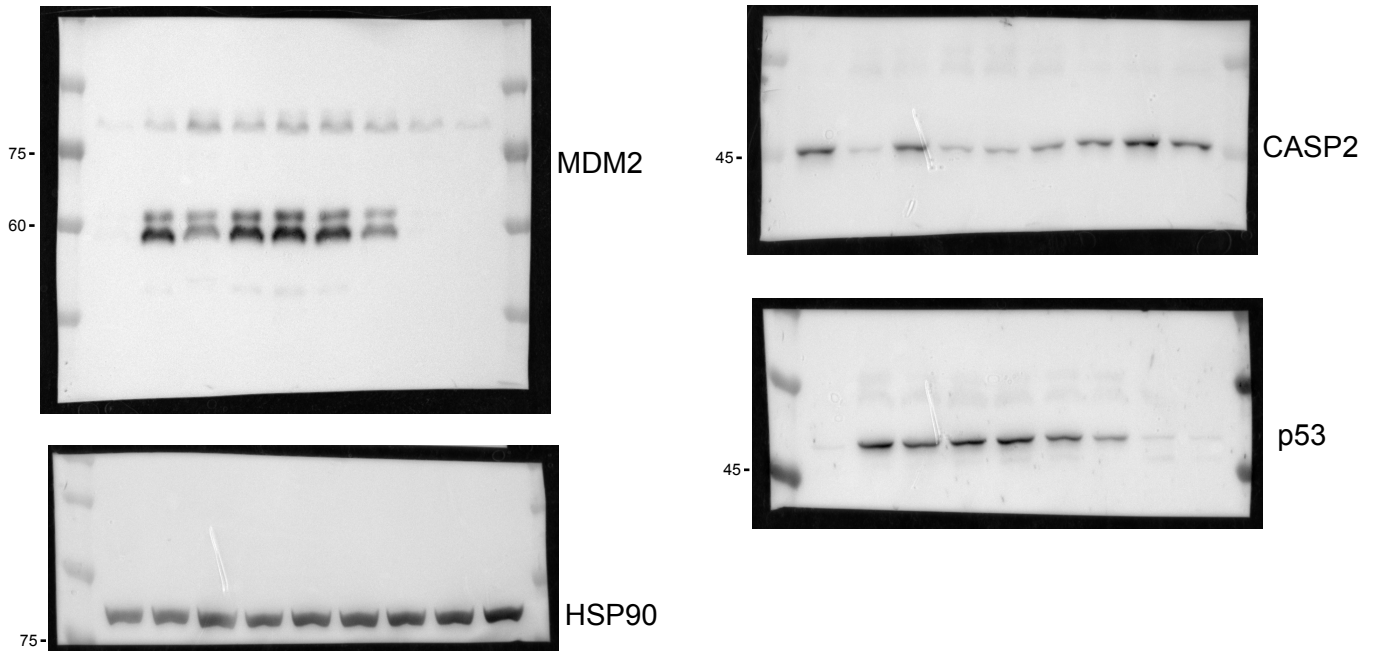

Western Blot membranes relative to figure 7E

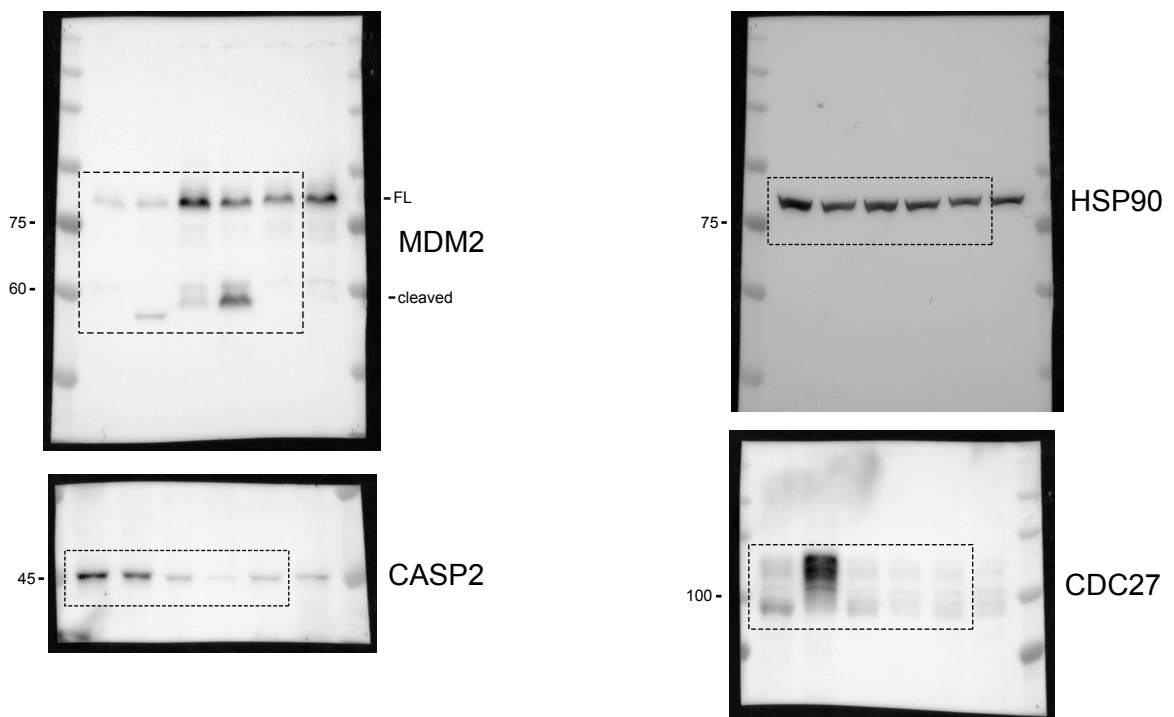

Supplement: EMBJ-40-e104844-s011.pdf [file EMBJ-40-e104844-s011.pdf]
